# Supplementary material for: Nanophysiology approach reveals diversity in calcium microdomains across zebrafish retinal bipolar ribbon synapses
Source: eLife. 2025 Dec 1;14:RP105875. doi: 10.7554/eLife.105875 (PMC12668674; doi:10.7554/eLife.105875)
Supplement: Supplementary file 3. — Simulations were performed assuming an endogenous buffer with a total concentration of either 1.4 mM total resting buffering capacity of 720 Oesch and Diamond, 2011; Burrone et al., 2002; Coggins and Zenisek, 2009, or a lower concentration of 200 µM corresponding to a buffering capacity of 100. Simulations in Figure 7 assumes immobile endogenous buffer, while this file assumes a typical value of buffer mobility of 0.05 µm2/ms. The Ca2+ clearance parameters are adapted from Graydon et al., 2011; Jarsky et al., 2010; Mennerick and Matthews, 1996; Singer and Diamond, 2003; Snellman et al., 2009; Von Gersdorff and Mathews, 1994; Augustine et al., 1991. Note that flux units of (µM µm)/ms are equivalent to 10–21 mol/(µm2ms)=602 ions/(µm2ms). Properties of EGTA and BAPTA (not listed here) are summarized in Burrone et al., 2002. [file elife-105875-supp3.docx]

| Symbol | Value / units | Description |
| --- | --- | --- |
| *C* | µM | Ca2+ concentration, [Ca2+] |
| *B* | µM | Free (unbound) buffer concentration, [B] |
| *B** | µM | Bound buffer concentration, [CaB] |
| *C*0 | 0.1 µM | Resting background [Ca2+] |
| *DC* | 0.22 µm2/ms | Intracellular diffusivity of Ca2+ ions |
| *DB* | 0 or 0.05 µm2/ms | Buffer diffusivity (two values used) |
| *Btotal* | 200 µM or 1.4 mM | Total buffer concentration (two values used) |
| *k+* | 0.1 (µM ms)-1 | Buffer-Ca2+ binding rate |
| *k-* | 0.2 ms-1 | Buffer-Ca2+ unbinding rate |
| *KD* | 2 µM | Buffer affinity |
| *A*NCX | 0.4 µM µm/ms | Maximal extrusion rate by NCX exchanger |
| *A*P | 0.03 µM µm/ms | Maximal extrusion rate by SERCA & PMCA pumps |
| *K*NCX | 1.5 µM | Affinity of NCX exchanger |
| *K*P | 0.3 µM | Affinity of SERCA/PMCA pumps |

**Supplementary File 3**: Model parameters for Ca2+ diffusion, buffering, and clearance. Simulations were performed assuming an endogenous buffer with a total concentration of either 1.4 mM (total resting buffering capacity of 720 6-8, or a lower concentration of 200 µM corresponding to a buffering capacity of 100. Simulations in **Fig. 7** assumes immobile endogenous buffer, while **Supplementary** **Fig. 4** assumes a typical value of buffer mobility of 0.05 µm2/ms. The Ca2+ clearance parameters are adapted from 9-15. Note that flux units of (µM µm)/ms are equivalent to 10-21 mol/(µm2ms) = 602 ions/(µm2ms). Properties of EGTA and BAPTA (not listed here) are summarized in 7.
